# Supplementary material for: Viviendo mi vida, Emma Goldman
Source: MDPI journal article supplement (doi:10.3390/antibiotics12121682), 1997-01-01
Supplement: s1 [file s1]

## Contents

Phyto-inhibitory activity of propolis samples: **Supplementary Table S1-S8**

Principal Component Analysis: **Supplementary Figure S1-S2**

**Supplementary Table S1.** Plumule growth lengths (mm) for wheat samples treated with different amounts of propolis powder in time.

| Day | 1 g |     |     |     |     |     |     |     |     | 5 g |     |     |     |     |     |     |     |     | 10 g |    |    |    |    |    |    |    |    | M<br>(mm) |
|-----|-----|-----|-----|-----|-----|-----|-----|-----|-----|-----|-----|-----|-----|-----|-----|-----|-----|-----|------|----|----|----|----|----|----|----|----|-----------|
|     | S1  | S2  | S3  | S4  | S5  | S6  | S7  | S8  | S9  | S1  | S2  | S3  | S4  | S5  | S6  | S7  | S8  | S9  | S1   | S2 | S3 | S4 | S5 | S6 | S7 | S8 | S9 |           |
| 3   | 16  | 16  | 14  | 15  | 15  | 14  | 13  | 15  | 12  | 7   | 5   | 5   | 3   | 4   | 6   | 5   | 6   | 6   | 0    | 0  | 0  | 0  | 0  | 0  | 0  | 0  | 0  | 24        |
| 5   | 32  | 30  | 31  | 30  | 33  | 31  | 30  | 33  | 29  | 19  | 18  | 15  | 12  | 13  | 16  | 14  | 17  | 16  | 4    | 3  | 4  | 2  | 3  | 2  | 4  | 3  | 2  | 39        |
| 7   | 80  | 78  | 77  | 77  | 81  | 79  | 76  | 79  | 75  | 55  | 52  | 50  | 51  | 49  | 53  | 54  | 53  | 52  | 18   | 15 | 13 | 10 | 12 | 13 | 14 | 11 | 9  | 82        |
| 9   | 104 | 98  | 96  | 93  | 107 | 99  | 97  | 100 | 92  | 66  | 64  | 63  | 62  | 60  | 61  | 65  | 61  | 63  | 25   | 24 | 20 | 21 | 22 | 24 | 25 | 23 | 21 | 101       |
| 11  | 117 | 110 | 113 | 112 | 120 | 116 | 111 | 119 | 109 | 101 | 98  | 96  | 95  | 89  | 90  | 97  | 94  | 98  | 32   | 30 | 25 | 25 | 26 | 28 | 33 | 27 | 26 | 123       |
| 13  | 138 | 125 | 122 | 120 | 131 | 128 | 125 | 133 | 121 | 113 | 113 | 115 | 111 | 112 | 114 | 116 | 113 | 115 | 41   | 40 | 38 | 36 | 37 | 39 | 42 | 38 | 35 | 145       |

**Supplementary Table S2.** Plumule growth lengths (mm) for wheat samples treated with different concentrations of propolis extract in time.

| Day | 1 % |     |     |     |     |     |     |     |     | 5 % |     |     |     |     |     |     |     |     | 10 % |    |    |    |    |    |    |    |    | M<br>(mm) |
|-----|-----|-----|-----|-----|-----|-----|-----|-----|-----|-----|-----|-----|-----|-----|-----|-----|-----|-----|------|----|----|----|----|----|----|----|----|-----------|
|     | S1  | S2  | S3  | S4  | S5  | S6  | S7  | S8  | S9  | S1  | S2  | S3  | S4  | S5  | S6  | S7  | S8  | S9  | S1   | S2 | S3 | S4 | S5 | S6 | S7 | S8 | S9 |           |
| 3   | 19  | 18  | 16  | 15  | 17  | 16  | 18  | 18  | 14  | 8   | 4   | 5   | 5   | 7   | 5   | 6   | 6   | 4   | 2    | 1  | 1  | 2  | 1  | 2  | 2  | 1  | 0  | 24        |
| 5   | 36  | 36  | 33  | 35  | 34  | 37  | 34  | 35  | 35  | 24  | 19  | 18  | 16  | 24  | 20  | 21  | 23  | 15  | 11   | 11 | 10 | 8  | 9  | 12 | 7  | 11 | 6  | 39        |
| 7   | 79  | 80  | 77  | 71  | 78  | 78  | 76  | 79  | 73  | 58  | 53  | 54  | 50  | 59  | 55  | 56  | 57  | 52  | 23   | 22 | 20 | 18 | 19 | 21 | 19 | 21 | 17 | 82        |
| 9   | 95  | 94  | 90  | 89  | 92  | 94  | 91  | 93  | 90  | 81  | 80  | 75  | 78  | 83  | 79  | 80  | 82  | 74  | 41   | 40 | 38 | 39 | 38 | 39 | 37 | 42 | 35 | 101       |
| 11  | 115 | 112 | 111 | 113 | 110 | 114 | 116 | 114 | 112 | 102 | 100 | 94  | 96  | 104 | 99  | 103 | 101 | 93  | 52   | 51 | 47 | 48 | 46 | 49 | 50 | 53 | 49 | 123       |
| 13  | 150 | 165 | 152 | 144 | 160 | 155 | 149 | 163 | 147 | 137 | 132 | 125 | 123 | 141 | 133 | 135 | 138 | 119 | 64   | 65 | 64 | 62 | 63 | 64 | 62 | 64 | 61 | 145       |

**Supplementary Table S3.** Plumule growth lengths (mm) for corn samples treated with different amounts of propolis powder in time.

| Day | 1 g |    |    |    |    |    |    |    |    | 5 g |    |    |    |    |    |    |    |    | 10 g |    |    |    |    |    |    |    |    | M<br>(mm) |
|-----|-----|----|----|----|----|----|----|----|----|-----|----|----|----|----|----|----|----|----|------|----|----|----|----|----|----|----|----|-----------|
|     | S1  | S2 | S3 | S4 | S5 | S6 | S7 | S8 | S9 | S1  | S2 | S3 | S4 | S5 | S6 | S7 | S8 | S9 | S1   | S2 | S3 | S4 | S5 | S6 | S7 | S8 | S9 |           |
| 3   | 3   | 2  | 1  | 2  | 1  | 1  | 2  | 1  | 0  | 0   | 0  | 0  | 0  | 0  | 0  | 0  | 0  | 0  | 0    | 0  | 0  | 0  | 0  | 0  | 0  | 0  | 0  | 15        |
| 5   | 14  | 14 | 14 | 12 | 13 | 14 | 12 | 11 | 11 | 2   | 2  | 1  | 0  | 1  | 1  | 0  | 1  | 0  | 0    | 0  | 0  | 0  | 0  | 0  | 0  | 0  | 0  | 23        |
| 7   | 28  | 26 | 27 | 24 | 27 | 27 | 24 | 25 | 23 | 21  | 17 | 12 | 10 | 19 | 12 | 16 | 14 | 11 | 4    | 2  | 0  | 1  | 3  | 1  | 2  | 0  | 0  | 37        |
| 9   | 35  | 33 | 31 | 30 | 33 | 34 | 32 | 30 | 28 | 28  | 24 | 22 | 18 | 27 | 23 | 20 | 21 | 19 | 12   | 10 | 8  | 9  | 11 | 10 | 10 | 8  | 9  | 54        |
| 11  | 40  | 38 | 40 | 41 | 40 | 39 | 41 | 40 | 37 | 38  | 33 | 32 | 27 | 35 | 37 | 39 | 33 | 28 | 18   | 18 | 15 | 17 | 16 | 15 | 16 | 14 | 13 | 65        |
| 13  | 53  | 51 | 54 | 52 | 52 | 53 | 50 | 51 | 50 | 49  | 48 | 40 | 34 | 49 | 50 | 48 | 46 | 37 | 23   | 24 | 20 | 21 | 22 | 20 | 21 | 19 | 19 | 83        |

**Supplementary Table S4.** Plumule growth lengths (mm) for corn samples treated with different concentrations of propolis extract in time.

| Day | 1 % |    |    |    |    |    |    |    |    | 5 % |    |    |    |    |    |    |    |    | 10 % |    |    |    |    |    |    |    |    | M<br>(mm) |
|-----|-----|----|----|----|----|----|----|----|----|-----|----|----|----|----|----|----|----|----|------|----|----|----|----|----|----|----|----|-----------|
|     | S1  | S2 | S3 | S4 | S5 | S6 | S7 | S8 | S9 | S1  | S2 | S3 | S4 | S5 | S6 | S7 | S8 | S9 | S1   | S2 | S3 | S4 | S5 | S6 | S7 | S8 | S9 |           |
| 3   | 10  | 8  | 9  | 8  | 9  | 8  | 7  | 8  | 7  | 3   | 4  | 2  | 2  | 1  | 2  | 2  | 1  | 1  | 0    | 0  | 0  | 0  | 0  | 0  | 0  | 0  | 0  | 15        |
| 5   | 21  | 23 | 22 | 18 | 22 | 23 | 20 | 19 | 17 | 6   | 5  | 3  | 4  | 3  | 5  | 4  | 3  | 2  | 4    | 4  | 3  | 4  | 4  | 4  | 3  | 2  | 2  | 23        |
| 7   | 34  | 34 | 31 | 29 | 33 | 33 | 32 | 30 | 28 | 20  | 18 | 17 | 19 | 18 | 19 | 18 | 17 | 15 | 9    | 10 | 8  | 7  | 10 | 9  | 9  | 7  | 6  | 37        |
| 9   | 44  | 45 | 40 | 40 | 43 | 44 | 41 | 41 | 39 | 31  | 30 | 31 | 31 | 29 | 30 | 27 | 28 | 26 | 16   | 15 | 14 | 11 | 16 | 14 | 15 | 14 | 13 | 54        |
| 11  | 53  | 55 | 51 | 53 | 54 | 53 | 52 | 53 | 50 | 42  | 42 | 40 | 39 | 41 | 41 | 40 | 38 | 35 | 20   | 22 | 19 | 17 | 21 | 20 | 19 | 20 | 18 | 65        |
| 13  | 65  | 64 | 66 | 64 | 64 | 63 | 65 | 62 | 61 | 58  | 60 | 59 | 55 | 57 | 59 | 56 | 54 | 51 | 30   | 31 | 30 | 26 | 30 | 29 | 27 | 26 | 25 | 83        |

**Supplementary Table S5.** Plumule growth lengths (mm) for barley samples treated with different amounts of propolis powder in time.

| Day | 1 g |     |     |     |     |     |     |     |     | 5 g |    |    |    |    |    |    |    |    | 10 g |    |    |    |    |    |    |    |    | M<br>(mm) |
|-----|-----|-----|-----|-----|-----|-----|-----|-----|-----|-----|----|----|----|----|----|----|----|----|------|----|----|----|----|----|----|----|----|-----------|
|     | S1  | S2  | S3  | S4  | S5  | S6  | S7  | S8  | S9  | S1  | S2 | S3 | S4 | S5 | S6 | S7 | S8 | S9 | S1   | S2 | S3 | S4 | S5 | S6 | S7 | S8 | S9 |           |
| 3   | 14  | 12  | 10  | 11  | 13  | 11  | 12  | 11  | 11  | 10  | 10 | 8  | 7  | 11 | 10 | 9  | 8  | 8  | 0    | 0  | 0  | 0  | 0  | 0  | 0  | 0  | 0  | 23        |
| 5   | 29  | 28  | 29  | 26  | 27  | 26  | 27  | 25  | 26  | 18  | 15 | 17 | 16 | 17 | 16 | 16 | 17 | 14 | 12   | 11 | 10 | 8  | 11 | 11 | 10 | 9  | 9  | 40        |
| 7   | 38  | 33  | 37  | 34  | 37  | 35  | 39  | 36  | 34  | 29  | 31 | 30 | 27 | 29 | 30 | 28 | 27 | 28 | 20   | 18 | 16 | 19 | 18 | 17 | 19 | 17 | 16 | 55        |
| 9   | 64  | 66  | 61  | 60  | 65  | 66  | 62  | 64  | 61  | 56  | 55 | 54 | 50 | 53 | 52 | 51 | 51 | 49 | 50   | 52 | 50 | 47 | 52 | 51 | 50 | 47 | 49 | 90        |
| 11  | 88  | 85  | 83  | 81  | 87  | 83  | 86  | 84  | 82  | 79  | 75 | 77 | 71 | 76 | 74 | 72 | 78 | 66 | 63   | 62 | 56 | 51 | 59 | 60 | 58 | 56 | 53 | 101       |
| 13  | 110 | 105 | 108 | 107 | 106 | 108 | 105 | 103 | 103 | 91  | 90 | 88 | 89 | 90 | 90 | 87 | 89 | 87 | 80   | 84 | 77 | 73 | 83 | 82 | 80 | 79 | 78 | 132       |

**Supplementary Table S6.** Plumule growth lengths (mm) for barley samples treated with different concentrations of propolis extract in time.

| Day | 1 % |     |     |    |     |     |     |     |    | 5 % |    |    |    |    |    |    |    |    | 10 % |    |    |    |    |    |    |    |    | M<br>(mm) |
|-----|-----|-----|-----|----|-----|-----|-----|-----|----|-----|----|----|----|----|----|----|----|----|------|----|----|----|----|----|----|----|----|-----------|
|     | S1  | S2  | S3  | S4 | S5  | S6  | S7  | S8  | S9 | S1  | S2 | S3 | S4 | S5 | S6 | S7 | S8 | S9 | S1   | S2 | S3 | S4 | S5 | S6 | S7 | S8 | S9 |           |
| 3   | 19  | 17  | 16  | 15 | 18  | 15  | 16  | 16  | 14 | 12  | 9  | 11 | 8  | 11 | 11 | 10 | 9  | 9  | 2    | 1  | 1  | 1  | 1  | 1  | 1  | 0  | 0  | 23        |
| 5   | 34  | 35  | 33  | 29 | 35  | 34  | 32  | 30  | 31 | 23  | 20 | 21 | 23 | 22 | 22 | 20 | 21 | 19 | 17   | 15 | 18 | 14 | 18 | 17 | 15 | 17 | 16 | 40        |
| 7   | 45  | 42  | 46  | 40 | 44  | 43  | 41  | 42  | 43 | 31  | 37 | 34 | 30 | 36 | 35 | 33 | 32 | 29 | 24   | 22 | 23 | 20 | 26 | 25 | 22 | 24 | 24 | 55        |
| 9   | 70  | 67  | 69  | 66 | 71  | 68  | 67  | 65  | 68 | 44  | 42 | 44 | 45 | 45 | 44 | 42 | 43 | 41 | 52   | 51 | 50 | 47 | 48 | 50 | 49 | 51 | 39 | 90        |
| 11  | 92  | 90  | 91  | 89 | 90  | 88  | 89  | 86  | 85 | 82  | 81 | 89 | 82 | 88 | 87 | 83 | 77 | 78 | 69   | 67 | 71 | 59 | 67 | 66 | 70 | 69 | 60 | 101       |
| 13  | 107 | 101 | 113 | 97 | 112 | 109 | 106 | 102 | 98 | 96  | 98 | 95 | 92 | 97 | 96 | 96 | 94 | 93 | 83   | 82 | 88 | 79 | 85 | 86 | 83 | 81 | 80 | 132       |

**Supplementary Table S7.** Plumule growth lengths (mm) for oat samples treated with different amounts of propolis powder in time.

| Day | 1 g |    |    |    |    |    |    |    |    | 5 g |    |    |    |    |    |    |    |    | 10 g |    |    |    |    |    |    |    |    | M<br>(mm) |
|-----|-----|----|----|----|----|----|----|----|----|-----|----|----|----|----|----|----|----|----|------|----|----|----|----|----|----|----|----|-----------|
|     | S1  | S2 | S3 | S4 | S5 | S6 | S7 | S8 | S9 | S1  | S2 | S3 | S4 | S5 | S6 | S7 | S8 | S9 | S1   | S2 | S3 | S4 | S5 | S6 | S7 | S8 | S9 |           |
| 3   | 16  | 15 | 18 | 19 | 15 | 17 | 16 | 16 | 14 | 5   | 5  | 4  | 5  | 4  | 4  | 5  | 4  | 3  | 0    | 0  | 0  | 0  | 0  | 0  | 0  | 0  | 0  | 25        |
| 5   | 24  | 22 | 24 | 24 | 23 | 25 | 23 | 22 | 22 | 11  | 12 | 10 | 11 | 10 | 12 | 11 | 11 | 9  | 4    | 2  | 2  | 1  | 3  | 2  | 2  | 1  | 1  | 30        |
| 7   | 33  | 32 | 33 | 32 | 32 | 31 | 33 | 32 | 30 | 21  | 22 | 20 | 22 | 21 | 21 | 22 | 21 | 20 | 12   | 11 | 9  | 8  | 11 | 10 | 9  | 8  | 7  | 44        |
| 9   | 42  | 41 | 40 | 42 | 41 | 40 | 41 | 40 | 38 | 37  | 39 | 32 | 38 | 36 | 37 | 35 | 34 | 31 | 23   | 22 | 22 | 21 | 22 | 21 | 20 | 21 | 20 | 65        |
| 11  | 51  | 55 | 56 | 52 | 52 | 54 | 53 | 53 | 50 | 45  | 44 | 48 | 42 | 47 | 46 | 43 | 41 | 42 | 30   | 27 | 28 | 23 | 30 | 27 | 29 | 26 | 25 | 102       |
| 13  | 60  | 62 | 63 | 59 | 61 | 62 | 61 | 60 | 59 | 58  | 50 | 53 | 52 | 53 | 52 | 51 | 50 | 50 | 39   | 36 | 33 | 38 | 38 | 36 | 36 | 37 | 34 | 123       |

**Supplementary Table S8.** Plumule growth lengths (mm) for oat samples treated with different concentrations of propolis extract in time.

| Day | 1 % |    |    |    |    |    |    |    |    | 5 % |    |    |    |    |    |    |    |    | 10 % |    |    |    |    |    |    |    |    | M<br>(mm) |
|-----|-----|----|----|----|----|----|----|----|----|-----|----|----|----|----|----|----|----|----|------|----|----|----|----|----|----|----|----|-----------|
|     | S1  | S2 | S3 | S4 | S5 | S6 | S7 | S8 | S9 | S1  | S2 | S3 | S4 | S5 | S6 | S7 | S8 | S9 | S1   | S2 | S3 | S4 | S5 | S6 | S7 | S8 | S9 |           |
| 3   | 21  | 19 | 17 | 18 | 20 | 19 | 21 | 20 | 16 | 9   | 9  | 8  | 7  | 10 | 8  | 8  | 9  | 6  | 1    | 0  | 0  | 0  | 1  | 0  | 0  | 1  | 0  | 25        |
| 5   | 30  | 27 | 28 | 23 | 31 | 26 | 29 | 30 | 22 | 18  | 17 | 19 | 18 | 16 | 19 | 18 | 16 | 14 | 10   | 9  | 7  | 8  | 6  | 4  | 4  | 5  | 4  | 30        |
| 7   | 43  | 42 | 44 | 40 | 44 | 40 | 43 | 41 | 39 | 28  | 27 | 23 | 26 | 25 | 26 | 26 | 24 | 22 | 17   | 18 | 15 | 13 | 16 | 12 | 14 | 17 | 11 | 44        |
| 9   | 50  | 48 | 49 | 47 | 52 | 51 | 49 | 50 | 46 | 42  | 43 | 41 | 45 | 44 | 42 | 41 | 40 | 39 | 28   | 25 | 22 | 27 | 29 | 24 | 25 | 26 | 21 | 65        |
| 11  | 70  | 71 | 70 | 68 | 69 | 67 | 59 | 64 | 58 | 51  | 54 | 50 | 51 | 53 | 52 | 51 | 52 | 50 | 45   | 44 | 43 | 40 | 44 | 40 | 41 | 43 | 39 | 102       |
| 13  | 81  | 80 | 82 | 75 | 81 | 79 | 80 | 79 | 76 | 62  | 66 | 60 | 63 | 65 | 62 | 60 | 64 | 59 | 53   | 55 | 52 | 50 | 54 | 51 | 53 | 54 | 49 | 123       |

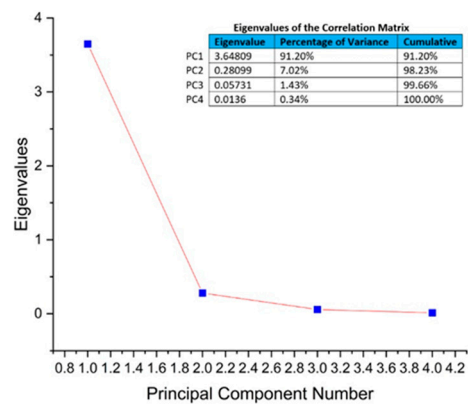

**Supplementary Figure S1.** Explanation of the total variance of the PCs, respectively the eigenvariance for each of the PCs in the case of the first stage PCA analysis.

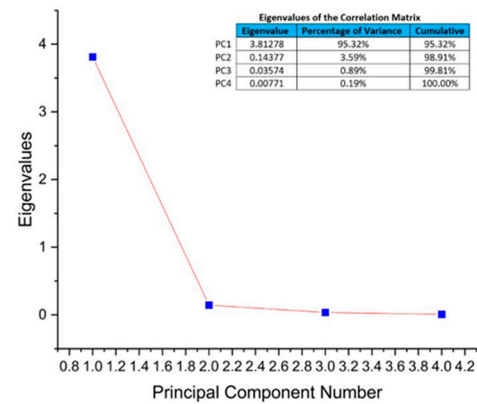

**Supplementary Figure S2.** Explanation of the total variance of the PCs, respectively the eigenvariance for each of the PCs in the case of the second stage PCA analysis.
